# Supplementary material for: Investigation of silica nanoparticle distribution in nanoporous polystyrene fibers
Source: Royal Society of Chemistry journal article supplement (doi:10.1039/c1sm05791j), 2011-01-01
Supplement: c1sm05791j.pdf [file c1sm05791j.pdf]

**Electronic Supplementary Information (ESI) for:**

**Investigation of Silica Nanoparticles Distribution in**

**Nanoporous Polystyrene Fibers**

**Bin Ding,<sup>\*a,b</sup> Jinyou Lin,<sup>a,b,c</sup> Xianfeng Wang,<sup>a,b,c</sup> Jianyong Yu,<sup>\*b</sup> Jianmao Yang<sup>d</sup> and Yu  
Cai<sup>c</sup>**

*<sup>a</sup> State Key Laboratory for Modification of Chemical Fibers and Polymer Materials,  
College of Materials Science and Engineering, Donghua University, Shanghai  
201620, China. E-mail: binding@dhu.edu.cn*

*<sup>b</sup> Nanomaterials Research Center, Research Institute of Donghua University,  
Shanghai 200051, China. E-mail: yujy@dhu.edu.cn*

*<sup>c</sup> College of Textiles, Donghua University, Shanghai 201620, China*

*<sup>d</sup> Research Center for Analysis and Measurement, Donghua University, Shanghai  
201620, China*

\* To whom correspondence should be addressed.

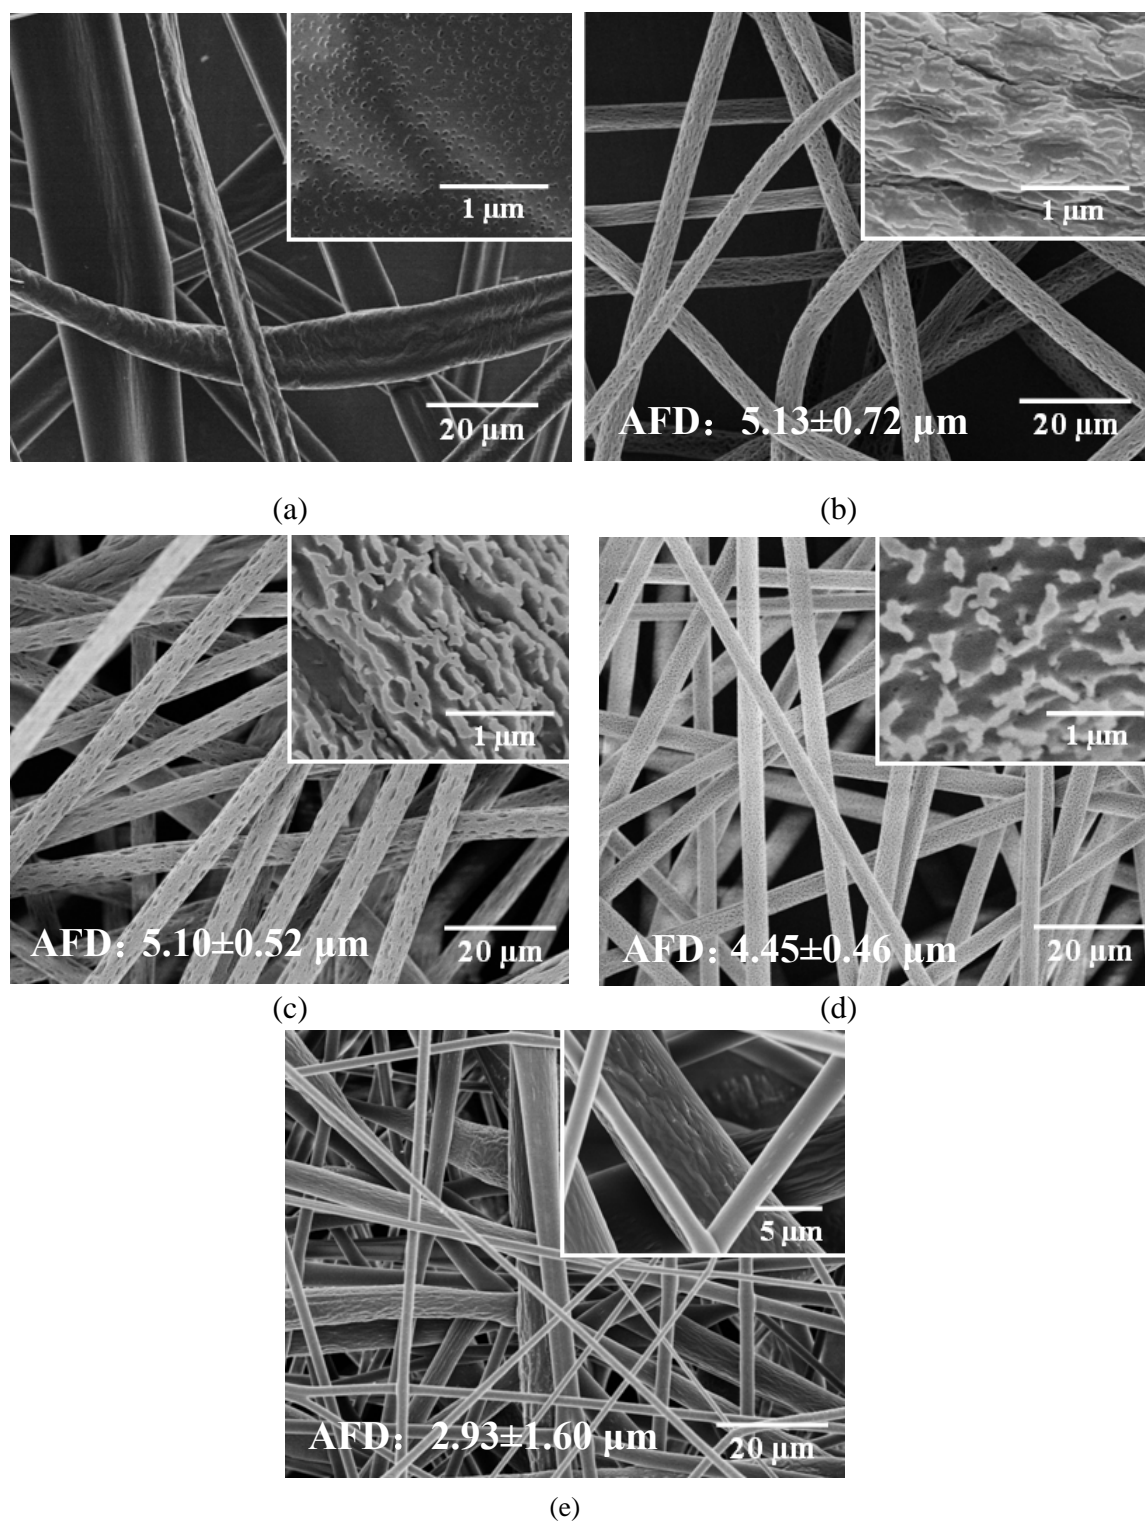

Figure S1. FE-SEM images of PS fibers formed from various weight ratios of THF/DMF in solvent: (a) 4/0, (b) 3/1, (c) 2/2, (d) 1/3, and (e) 0/4. (AFD represents average fiber diameter.)

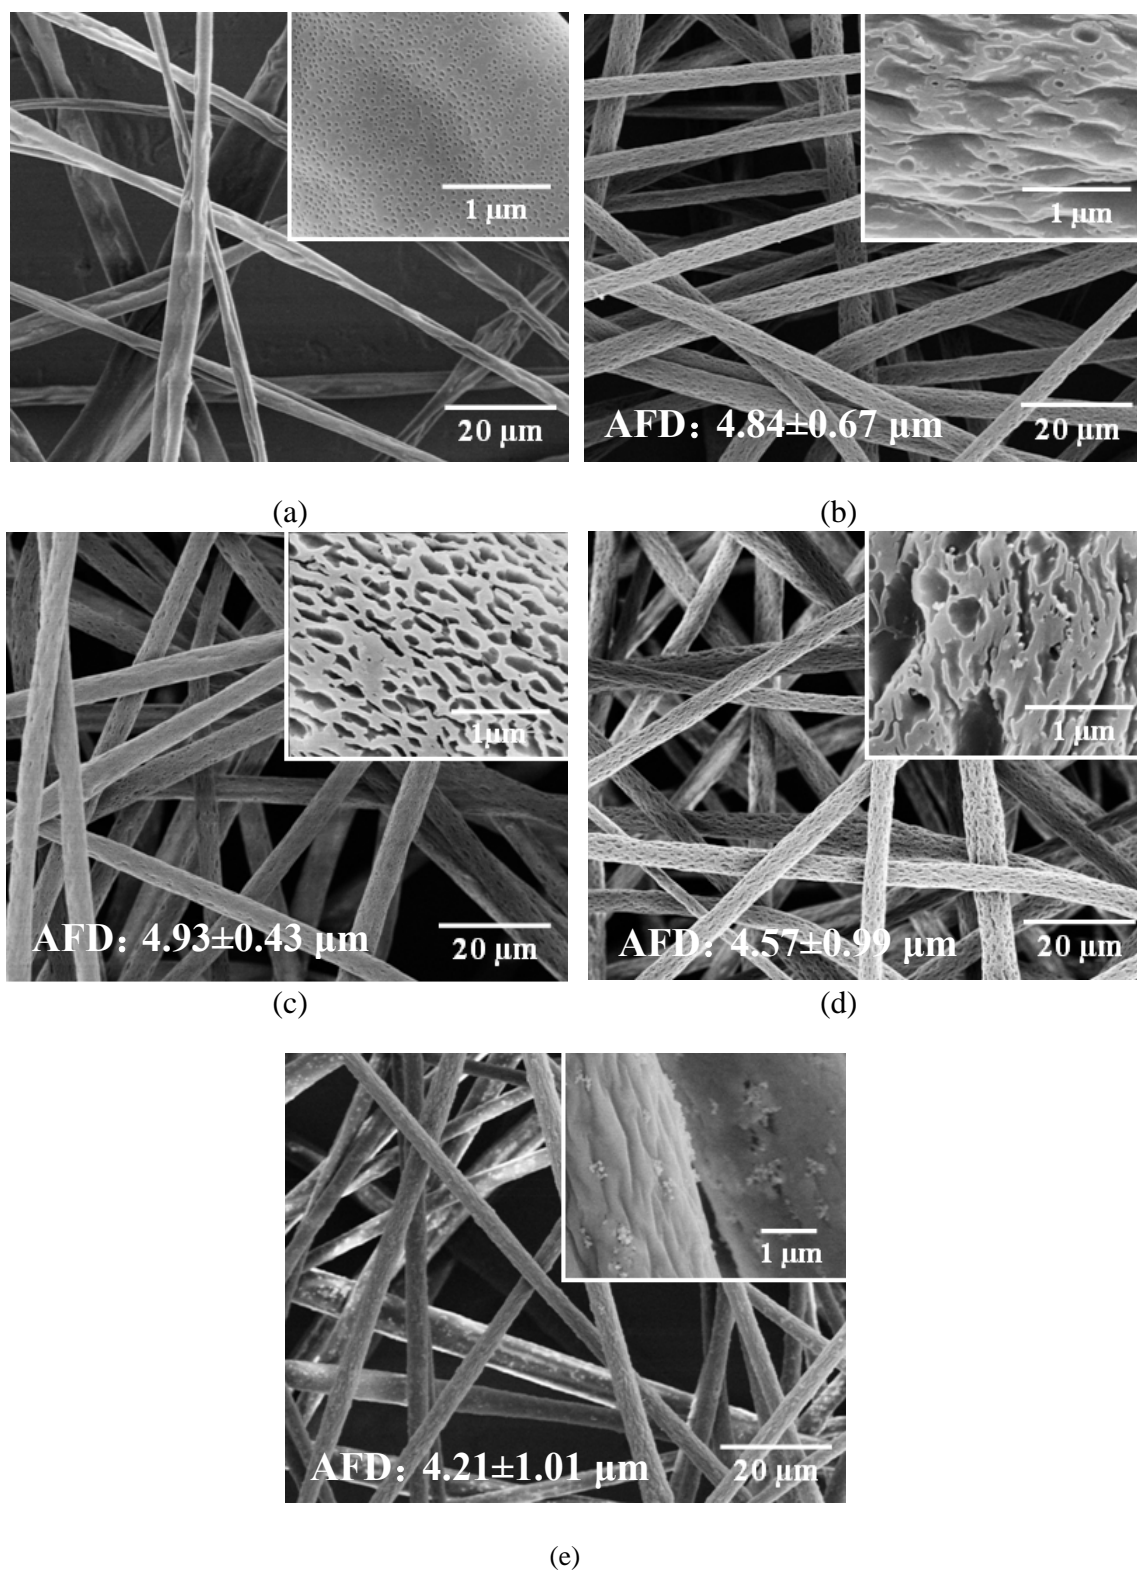

Figure S2. FE-SEM images of PS fibers loaded with 7.7 wt% silica formed from various weight ratios of THF/DMF in solvent: (a) 4/0, (b) 3/1, (c) 2/2, (d) 1/3, and (e) 0/4.

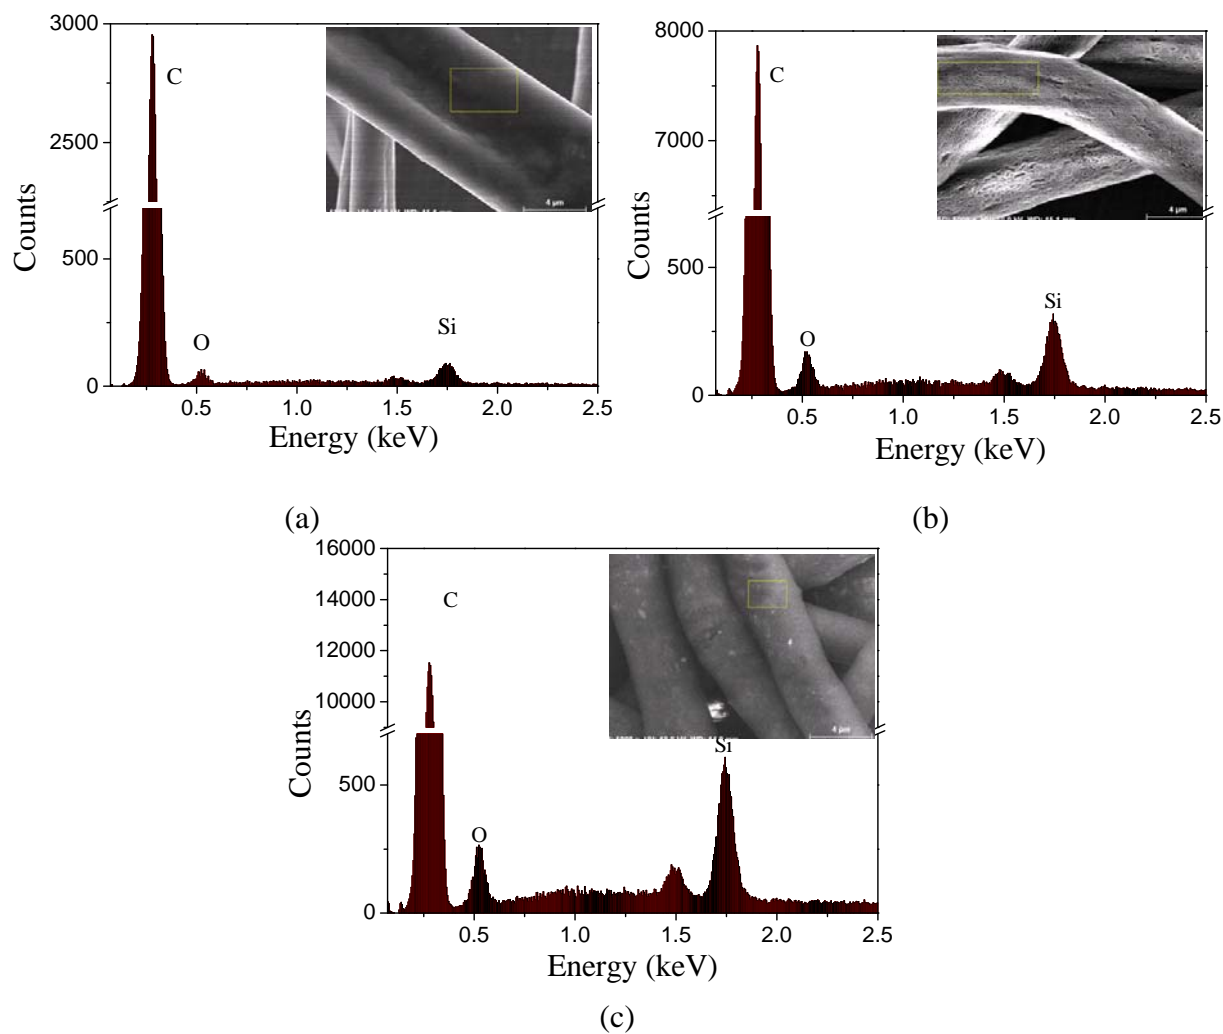

Figure S3. EDX spectrum of PS fibers loaded with 7.7 wt% silica formed from various weight ratios of THF/DMF in solvent: (a) 4/0, (b) 2/2, and (c) 0/4. (Red squares in insets of FE-SEM images as insets of (a), (b) and (c) indicate the actual position of elements for EDX analysis)



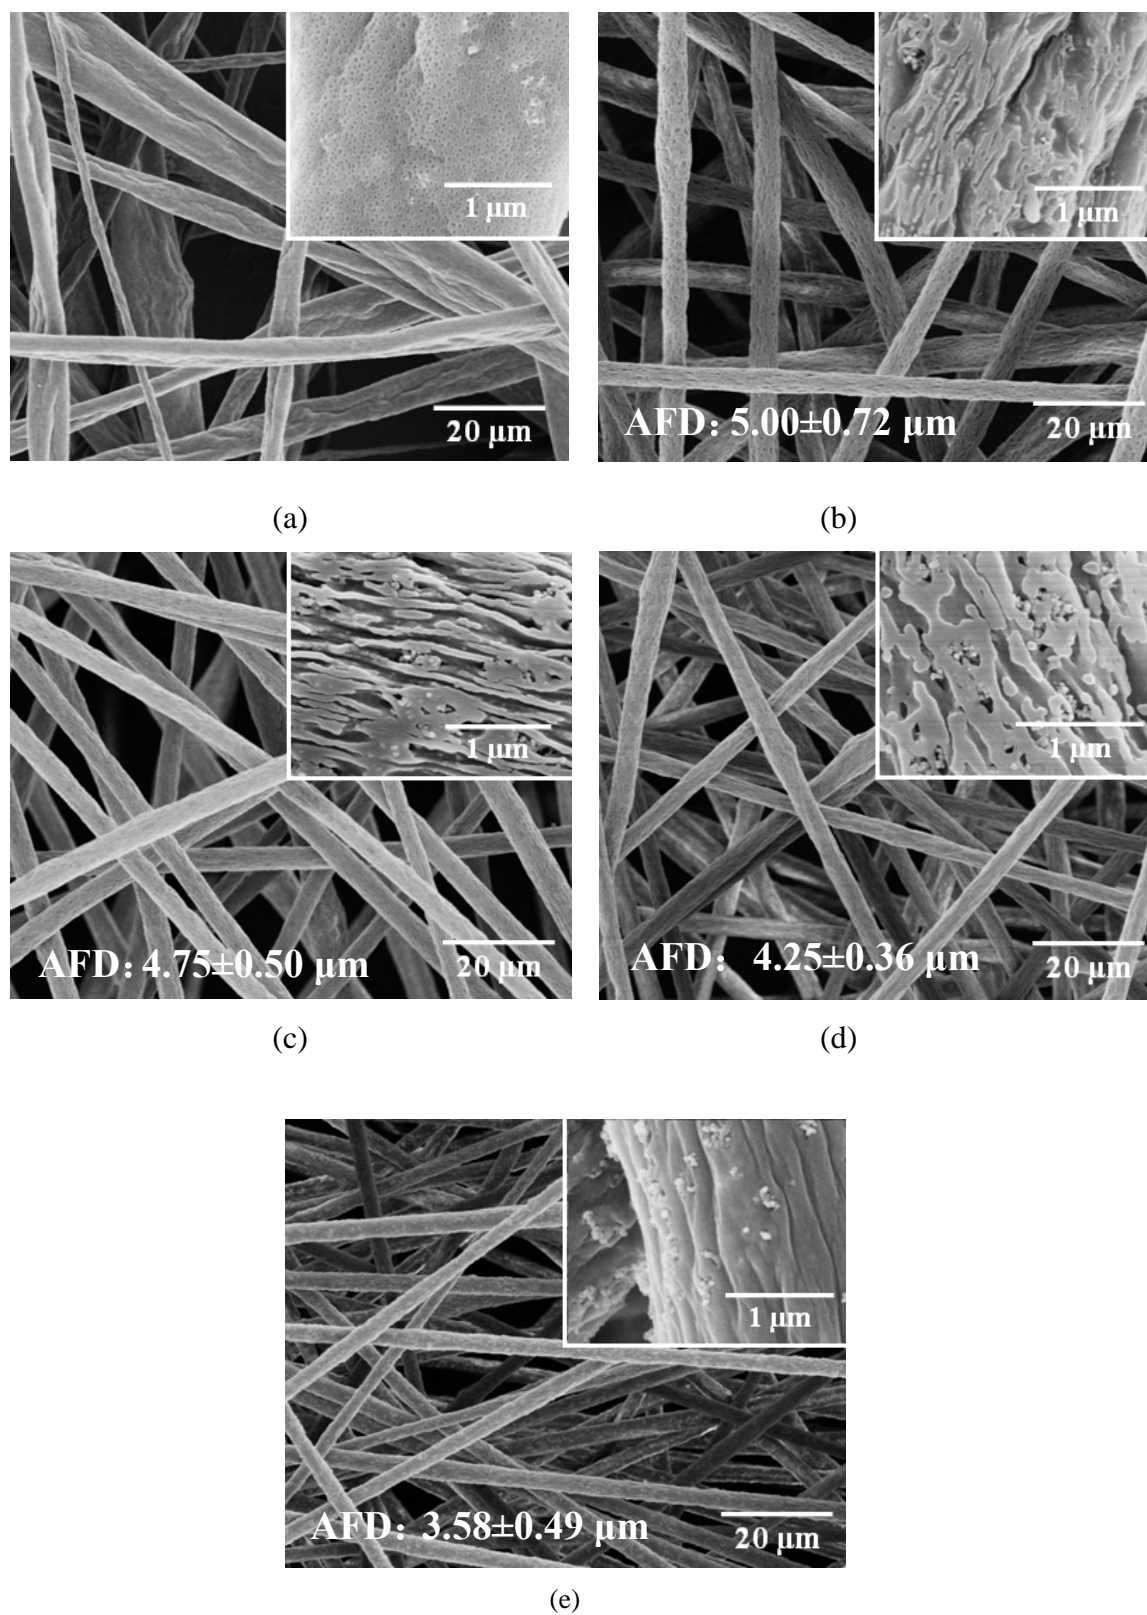

Figure S4. FE-SEM images of PS fibers loaded with 14.3 wt% silica formed from various weight ratios of THF/DMF in solvent: (a) 4/0, (b) 3/1, (c) 2/2, (d) 1/3, and (e) 0/4.

Table S1. Average elemental composition of PS fibers loaded with 7.7 wt% silica formed from various weight ratios of THF/DMF in solvent as determined by EDX<sup>a</sup>

| Polymer | THF/DMF (w/w) | Element | wt%         | at%         |
|---------|---------------|---------|-------------|-------------|
| PS      | 4/0           | Si      | 3.00 ± 0.21 | 1.32 ± 0.11 |
|         |               | O       | 5.26 ± 0.65 | 4.08 ± 0.57 |
|         | 2/2           | Si      | 3.85 ± 0.27 | 1.71 ± 0.13 |
|         |               | O       | 6.35 ± 0.90 | 4.96 ± 0.72 |
|         | 0/4           | Si      | 4.99 ± 0.22 | 2.24 ± 0.11 |
|         |               | O       | 7.28 ± 1.37 | 5.74 ± 1.11 |

<sup>a</sup> Multiple areas on the sample were tested, and the average measurements and standard deviation were calculated (three measurements were done on each sample to determine the average).

Table S2. WCAs of the as-prepared PS fibrous mats<sup>a</sup>

| Polymer | Silica content<br>(wt%) | Solvent composition<br>(THF/DMF, w/w) | WCA (°)     |
|---------|-------------------------|---------------------------------------|-------------|
| PS      | 0                       | 0/4                                   | 148.6 ± 1.9 |
|         |                         | 1/3                                   | 155.6 ± 1.8 |
|         |                         | 2/2                                   | 154.0 ± 1.6 |
|         |                         | 3/1                                   | 147.9 ± 1.7 |
|         |                         | 4/0                                   | 142.5 ± 2.1 |
|         |                         | 0/4                                   | 153.8 ± 1.3 |
|         | 7.7                     | 1/3                                   | 153.9 ± 1.4 |
|         |                         | 2/2                                   | 152.5 ± 1.1 |
|         |                         | 3/1                                   | 146.9 ± 1.3 |
|         |                         | 4/0                                   | 144.6 ± 1.9 |
|         | 14.3                    | 0/4                                   | 156.7 ± 0.6 |
|         |                         | 1/3                                   | 152.3 ± 0.9 |
|         |                         | 2/2                                   | 151.2 ± 1.1 |
|         |                         | 3/1                                   | 145.6 ± 1.0 |
|         |                         | 4/0                                   | 149.6 ± 1.5 |

<sup>a</sup> WCAs of each sample was measured five times at different place, and the average measurements and standard deviation were calculated.
